# Supplementary material for: The p63 C-terminus is essential for murine oocyte integrity
Source: PubMed Central journal article supplement (PMC7810856; doi:10.1038/s41467-020-20669-0), 2021-01-15
Supplement: 41467_2020_20669_MOESM1_ESM.pdf [file 41467_2020_20669_MOESM1_ESM.pdf]

## **Supplementary Information**

*The p63 C-terminus is essential for murine oocytes integrity*

Lena et al

---

| <b>Supplementary Table 1 PCR Primers</b> |                           |
|------------------------------------------|---------------------------|
| m3'UTR-R                                 | TGTAGGGGCTGGGAGGTGGAAG    |
| mEX13F                                   | GACCACCATCTATCAGATTGAGC   |
| mEX12F                                   | GACTCAGCCCTACCCAAGCTCTC   |
| mEX11F                                   | GATGCAGTCTCAGTCTTCATATG   |
| mEX10F                                   | GTGAGAGGTCGTGAGACGTAC     |
| mEX10'R                                  | CTATGGGTACACGGAGTGGTT     |
| m-bactinF                                | TGTCCCTGTATGCCTCTGGTCG    |
| m-bactinR                                | GAACCGCTCGTTGCCAATAGTG    |
| mJag2F                                   | CAAGTTCTGTGACGAGTGTGTCCC  |
| mJag2R                                   | TTGCCCAAGTAGCCATCTGG      |
| mJag1F                                   | CAAAGTGTGCCTCAAGGAGTATCAG |
| mJag1R                                   | TCCACCAGCAAAGTGTAGGACCTC  |
| mFgfR2-IIIbF                             | CCCATCCTCCAAGCTGGACTGCCT  |
| mFgfR2-IIIbR                             | CAGAACTGTCAACCATGCAGAGTG  |
| mK14F                                    | TCCCAATTCTCCTCATCCTC      |
| mK14R                                    | TAGTTCTTGGTGCGCAGGAC      |
| mCdkn1aF                                 | TGTTCCGCACAGGAGCAAAGTG    |
| mCdkn1aR                                 | CGAAGTCAAAGTTCCACCGTTCTCG |
| mPumaF                                   | AGGGAAGGGAGGGCTGAAGG      |
| mPumaR                                   | GAGGCCAGGCCCAAAGTGAA      |
| mNoxaF                                   | CGCTGGTGCTGCCTACTGAA      |
| mNoxaR                                   | GCCTTTCTCCCGGGCATCTC      |
| For genot                                | GCACTCCTTGGACCTCAGC       |
| Rev genot                                | TGTGTTGCCCAATCAGGTCTC     |

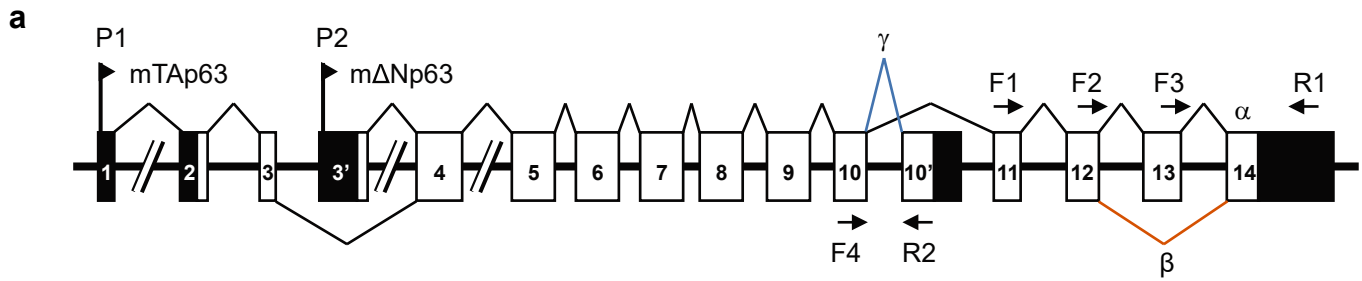

**b**

|         |      |                                                                                 |         |  |  |  |  |  |  |  |  |  |  |  |  |         |  |  |  |  |  |  |  |  |  |  |  |  |
|---------|------|---------------------------------------------------------------------------------|---------|--|--|--|--|--|--|--|--|--|--|--|--|---------|--|--|--|--|--|--|--|--|--|--|--|--|
|         |      |                                                                                 | exon 12 |  |  |  |  |  |  |  |  |  |  |  |  | exon 13 |  |  |  |  |  |  |  |  |  |  |  |  |
| mTAp63α | 2161 | GAC TGC AGC ATT GTC AGT TTC TTA GCA AGG TTG GGC TGC TCA TCA TGC CTG GAC TAT TTC | 2220    |  |  |  |  |  |  |  |  |  |  |  |  |         |  |  |  |  |  |  |  |  |  |  |  |  |
|         |      | D C S I V S F L A R L G C S S C L D Y F                                         |         |  |  |  |  |  |  |  |  |  |  |  |  |         |  |  |  |  |  |  |  |  |  |  |  |  |
| mTAp63β | 2161 | GAC TGC AGC ATT GTC AG                                                          | 2177    |  |  |  |  |  |  |  |  |  |  |  |  |         |  |  |  |  |  |  |  |  |  |  |  |  |
|         |      | D C S I V R                                                                     |         |  |  |  |  |  |  |  |  |  |  |  |  |         |  |  |  |  |  |  |  |  |  |  |  |  |
|         |      |                                                                                 | exon 14 |  |  |  |  |  |  |  |  |  |  |  |  |         |  |  |  |  |  |  |  |  |  |  |  |  |
| mTAp63α | 2221 | ACG ACC CAG GGG CTG ACC ACC ATC TAT CAG ATT GAG CAT TAC TCC ATG GAT GAT TTG GCA | 2280    |  |  |  |  |  |  |  |  |  |  |  |  |         |  |  |  |  |  |  |  |  |  |  |  |  |
|         |      | T T Q G L T T I Y Q I E H Y S M D D L A                                         |         |  |  |  |  |  |  |  |  |  |  |  |  |         |  |  |  |  |  |  |  |  |  |  |  |  |
| mTAp63β | 2178 | -----G ATT TGG CAA                                                              | 2186    |  |  |  |  |  |  |  |  |  |  |  |  |         |  |  |  |  |  |  |  |  |  |  |  |  |
|         |      | I W Q                                                                           |         |  |  |  |  |  |  |  |  |  |  |  |  |         |  |  |  |  |  |  |  |  |  |  |  |  |
| mTAp63α | 2281 | AGT CTG AAG ATC CCT GAA CAG TTC CGA CAT GCC ATC TGG AAG GGC ATC CTG GAC CAC AGG | 2340    |  |  |  |  |  |  |  |  |  |  |  |  |         |  |  |  |  |  |  |  |  |  |  |  |  |
|         |      | S L K I P E Q F R H A I W K G I L D H R                                         |         |  |  |  |  |  |  |  |  |  |  |  |  |         |  |  |  |  |  |  |  |  |  |  |  |  |
| mTAp63β | 2187 | GTC TGA AGA TCC CTG AAC AGT TCC GAC ATG CCA TCT GGA AGG GCA TCC TGG ACC ACA GG  | 2246    |  |  |  |  |  |  |  |  |  |  |  |  |         |  |  |  |  |  |  |  |  |  |  |  |  |
|         |      | V                                                                               |         |  |  |  |  |  |  |  |  |  |  |  |  |         |  |  |  |  |  |  |  |  |  |  |  |  |

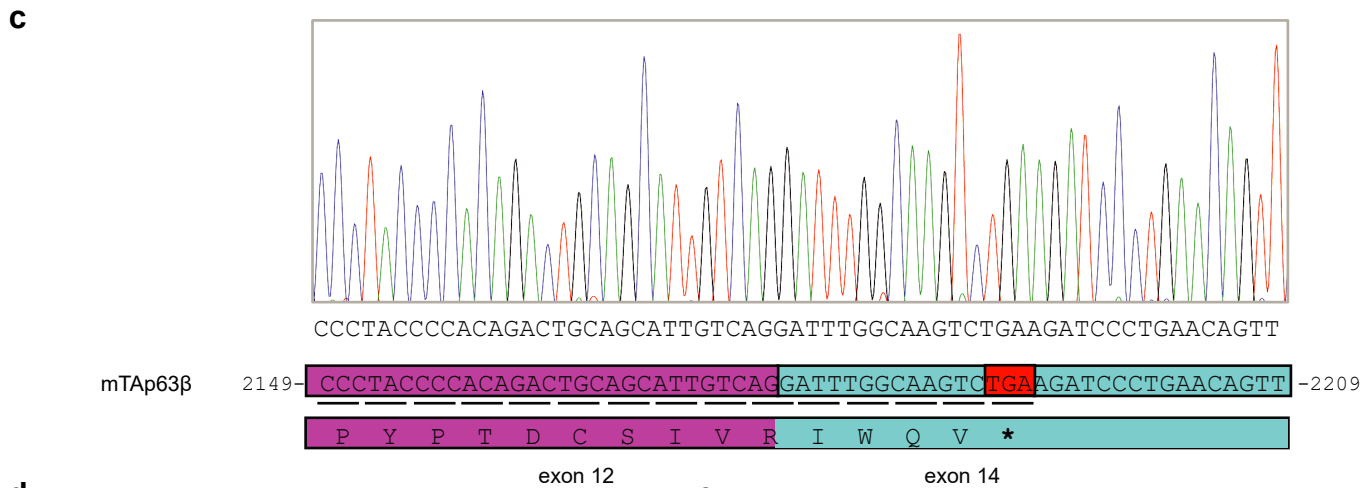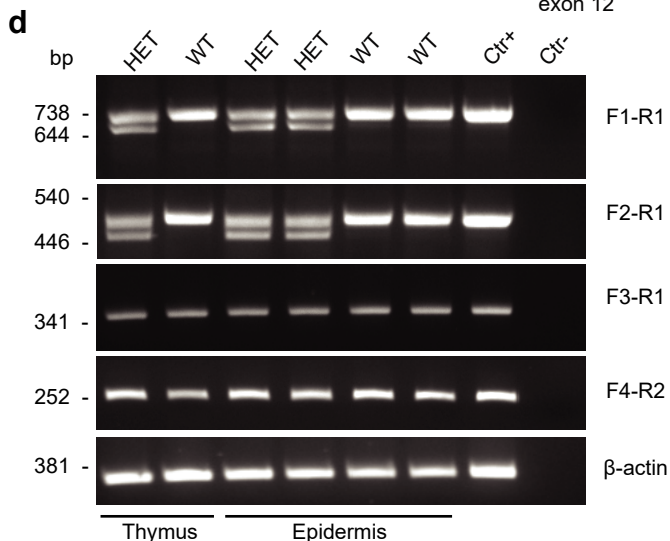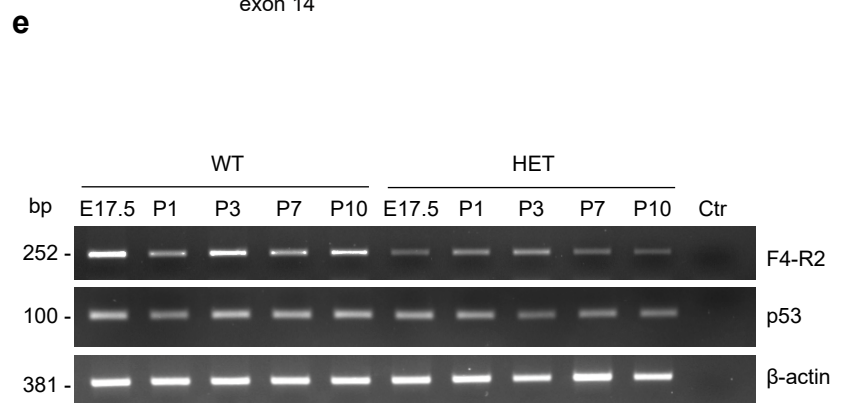

**Supplementary Figure 1. Expression of p63 isoform in  $\Delta 13p63$  heterozygous mice.** (a) *Trp63* gene structure. The semi-quantitative PCR primers F1, F2, F3, F4, R1 and R2 are depicted; (b) mTAp63 $\alpha$  and TAp63 $\beta$  isoform nucleotide and amino acid alignments. The exons and different amino acids are indicated by different colours; (c) Sequencing reaction electropherogram of the agarose gel-purified PCR fragments obtained by amplifying the  $\Delta 13p63$  cDNA allele expressed in thymus of new-born HET mice; (d) Semi-quantitative PCR analysis of p63 isoforms expression in P1 epidermis and thymus of WT and HET  $\Delta 13p63$  (indicated as HET in figure) mice. The PCR primers are described in (a). Ctr<sup>+</sup> indicates cDNA obtained from reverse transcription of the total RNA extracted by WT mouse keratinocytes; Ctr<sup>-</sup> indicates a no-template PCR; (e) Semi-quantitative PCR analysis of p63 $\gamma$  isoforms and p53 expression in ovaries isolated at stages E17.5, P1, P3, P7, P10 of WT and HET mice. PCR primers are described in (a). Ctr<sup>-</sup> indicates a no-template PCR. Source data are provided as a Source Data file.

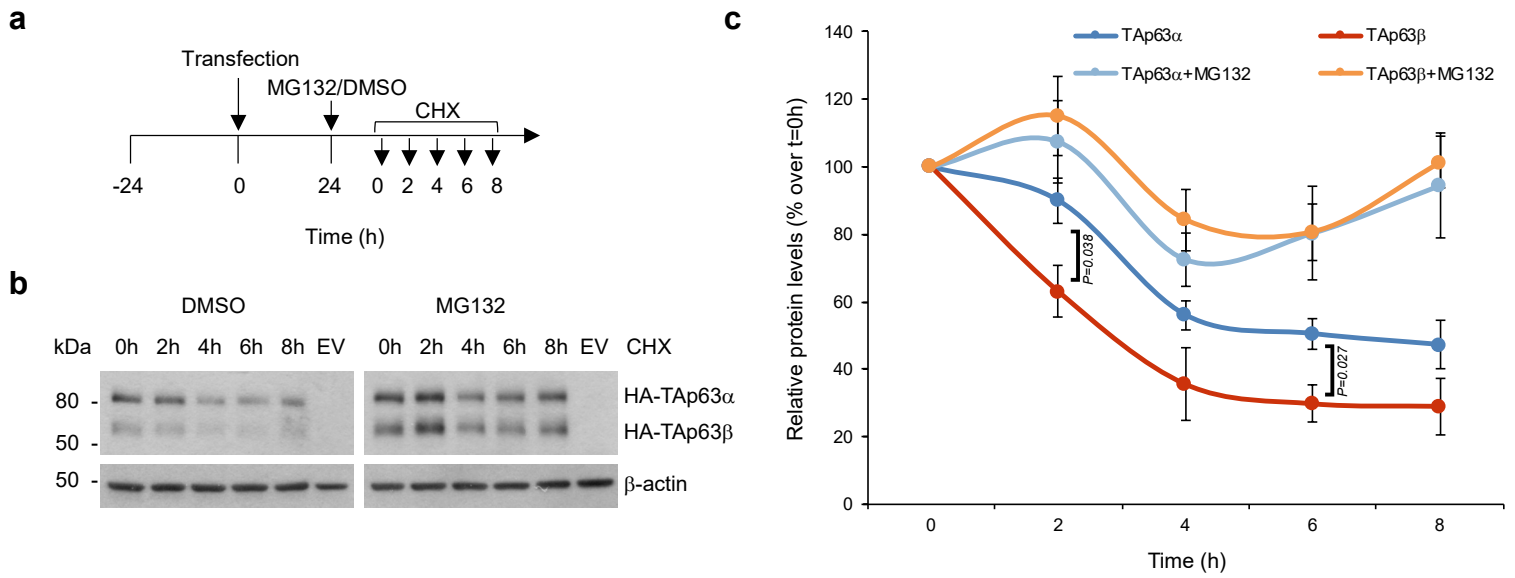

**Supplementary Figure 2. TAp63 $\beta$  isoform degrades faster than TAp63 $\alpha$ .** (a) H1299 cells were co-transfected with HA-tagged TAp63 $\alpha$  and TAp63 $\beta$  expression vectors (1:1 ratio); 24h after transfection cells were treated with the proteasome inhibitor MG132, or DMSO as control, and one hour later with cycloheximide (CHX). Cells were collected after 0, 2, 4, 6, 8h; (b) Protein levels detection by western blot at 0, 2, 4, 6, 8h after CHX treatment using an anti-HA antibody.  $\beta$ -actin was used as loading control and for normalization in the densitometric analysis; one representative experiment of four is shown; (c) Densitometric quantification of TAp63 $\alpha$  and TAp63 $\beta$  protein levels at the collected time points.  $n=4$  biologically independent experiments. Data are presented as mean  $\pm$  SEM,  $p$ -value by two-tailed unpaired Student's  $t$ -test, no adjustments for multiple comparison were made. Source data are provided as a Source Data file.

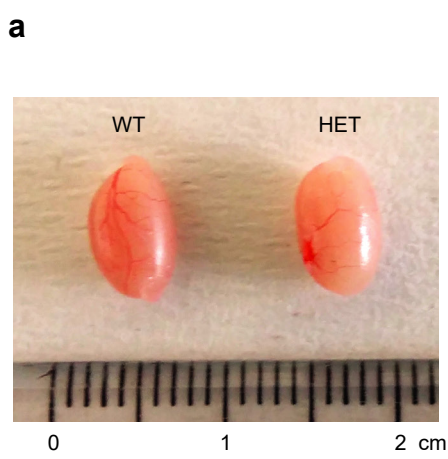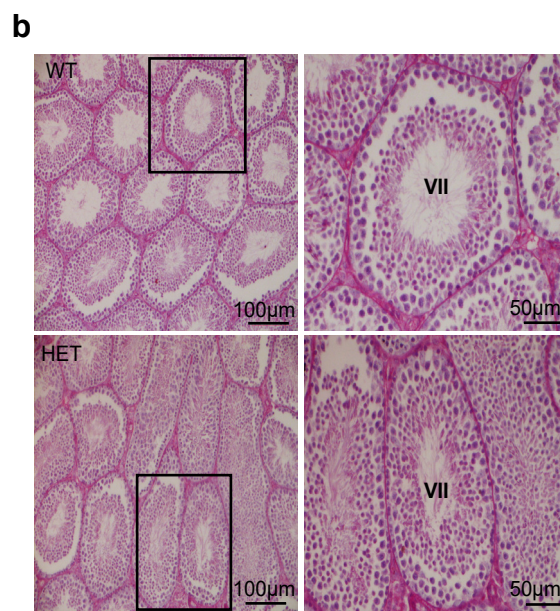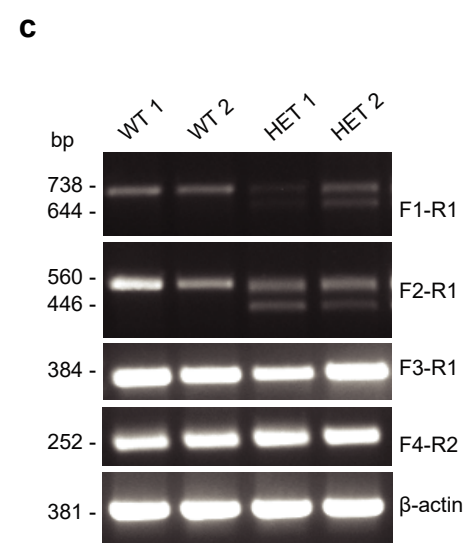

**Supplementary Figure 3. Characterization  $\Delta 13p63$  heterozygous testis.** (a) P45 WT and HET  $\Delta 13p63$  (indicated as HET in figure) testis size; (b) PAS staining of adult (P45) testis sections of WT and HET mice. The panels on the right side are magnifications of the areas in the black boxes. Both WT and HET testes showed normal appearances with round and elongate spermatids in stage VII tubules; (c) Semi-quantitative PCR analysis of p63 $\alpha$  and p63 $\beta$  isoforms expression at P45 testes of WT and HET (n=2) mice;  $\beta$ -actin was used as a housekeeping gene for normalization. The PCR primers are described in Supplementary Figure 1a. Source data are provided as a Source Data file.

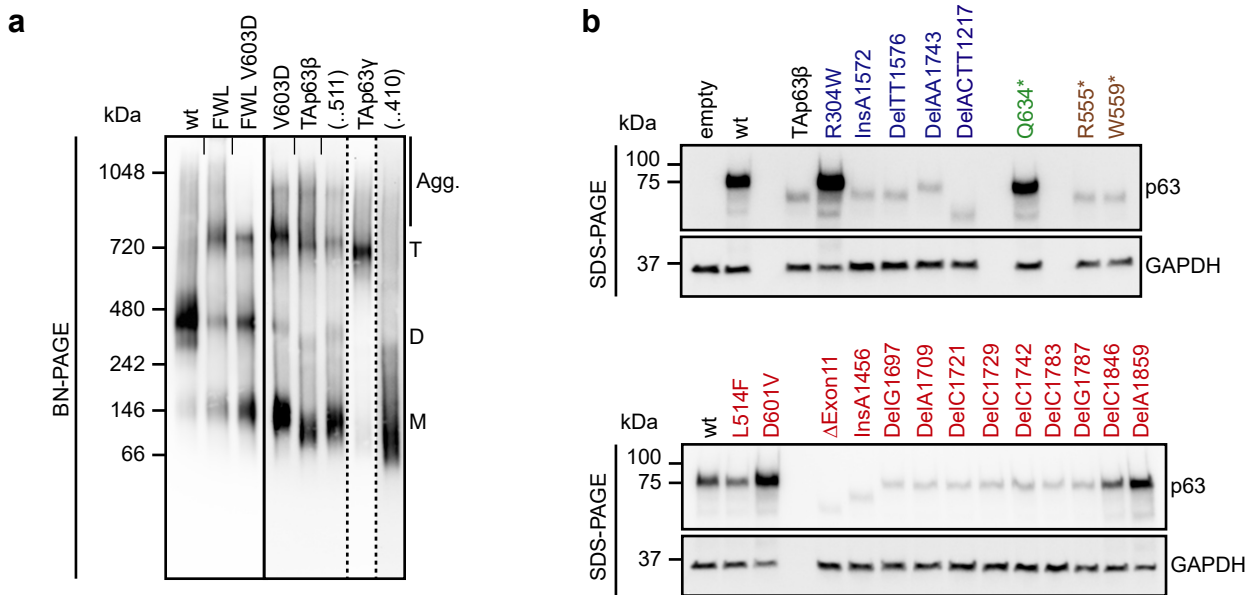

**Supplementary Figure 4. WB analysis of TAp63 isoform and mutant expression in luciferase assay extracts. (a)** Oligomeric state analysis of the indicated p63 isoforms and C-terminal truncations via BN- PAGE expressed transiently in transfected H1299 cells. The oligomeric conformation is indicated by T (tetramer), D (dimer), M (monomer) and, additionally, Agg. for aggregation; **(b)** WB analysis of mutant TAp63 $\alpha$  expression in the luciferase assay extracts described in Figure 5b. GAPDH was used as loading control. Source data are provided as a Source Data file.

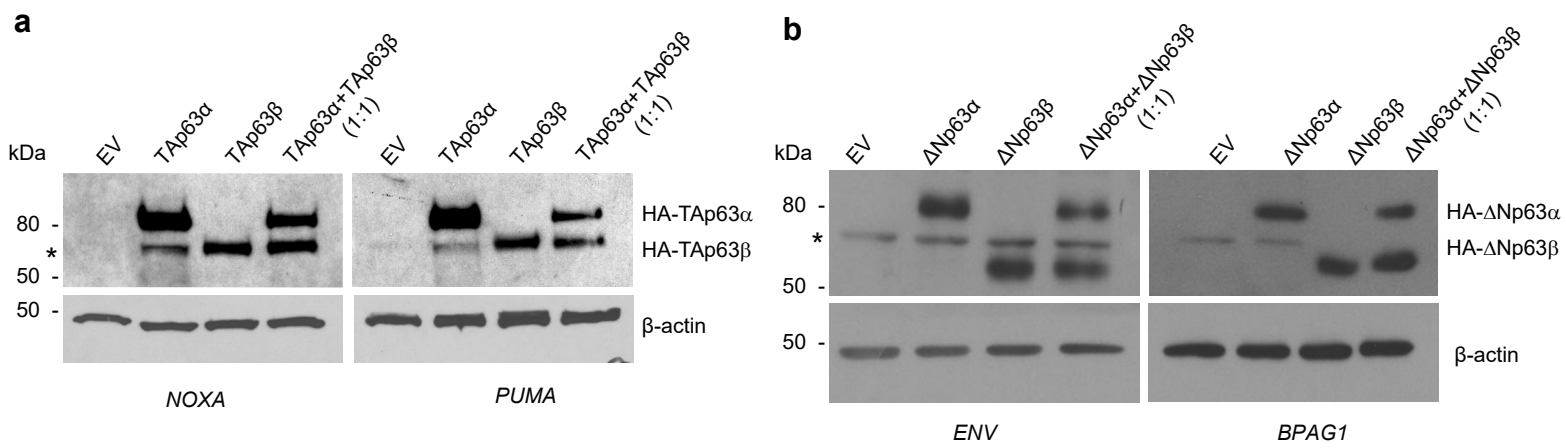

**Supplementary Figure 5. WB analysis of TAp63 and  $\Delta$ Np63 isoforms expression in luciferase assay extracts.** (a) WB analysis of TAp63 isoforms expression in the luciferase assay extracts described in Figure 4d.  $\beta$ -Actin was used as a loading control. \*, non-specific band; (b) WB analysis of  $\Delta$ Np63 isoforms expression in the luciferase assay extracts described in Figure 4e;  $\beta$ -actin was used as a loading control. \*, non-specific band. Source data are provided as a Source Data file.

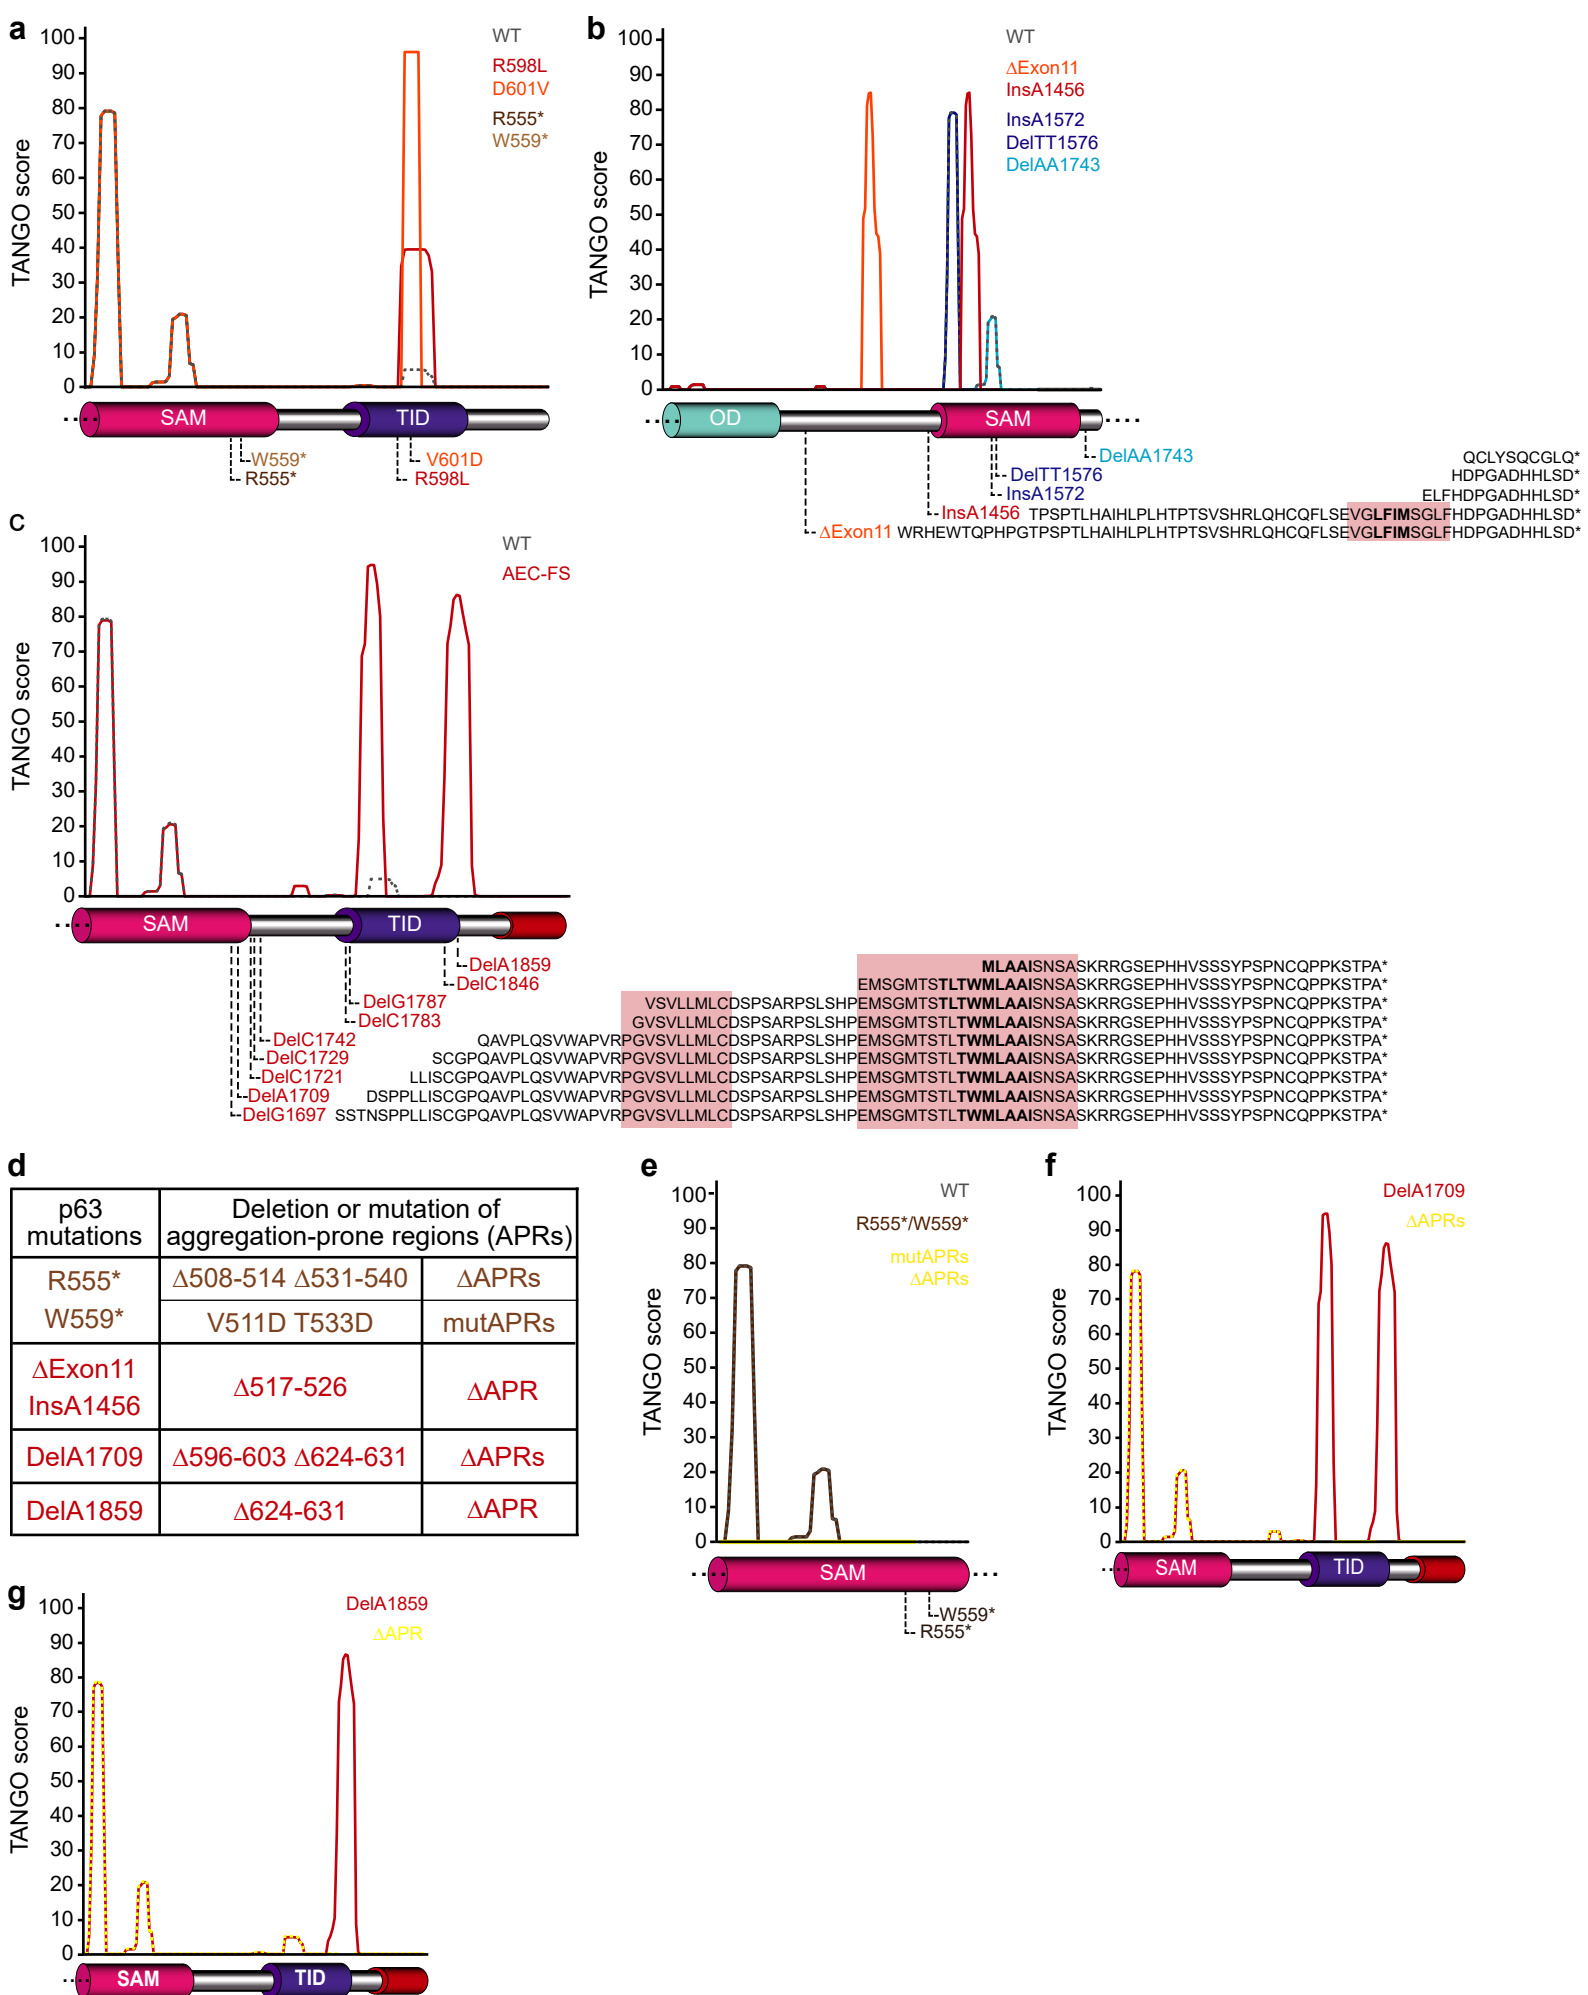

**Supplementary Fig 6. *In silico* analysis of aggregation prone regions by TANGO algorithm.** Analysis was performed using the following parameters: pH 7.2, 4°C, ionic strength 150 mM. (a-c) TANGO prediction of aggregation prone peptides for AEC/RHS, POI and ELA mutations compared to WT p63α; (d) POI and selected AEC/RHS mutant p63α aggregation rescue mutations by either deletion of the aggregation prone region (APR) or Asp mutation, named in the following uniformly ΔAPR or mutAPR; (e-g) TANGO predictions of selected mutant p63α aggregation rescue mutations, ΔAPR or mutAPR, compared to mutant p63α.



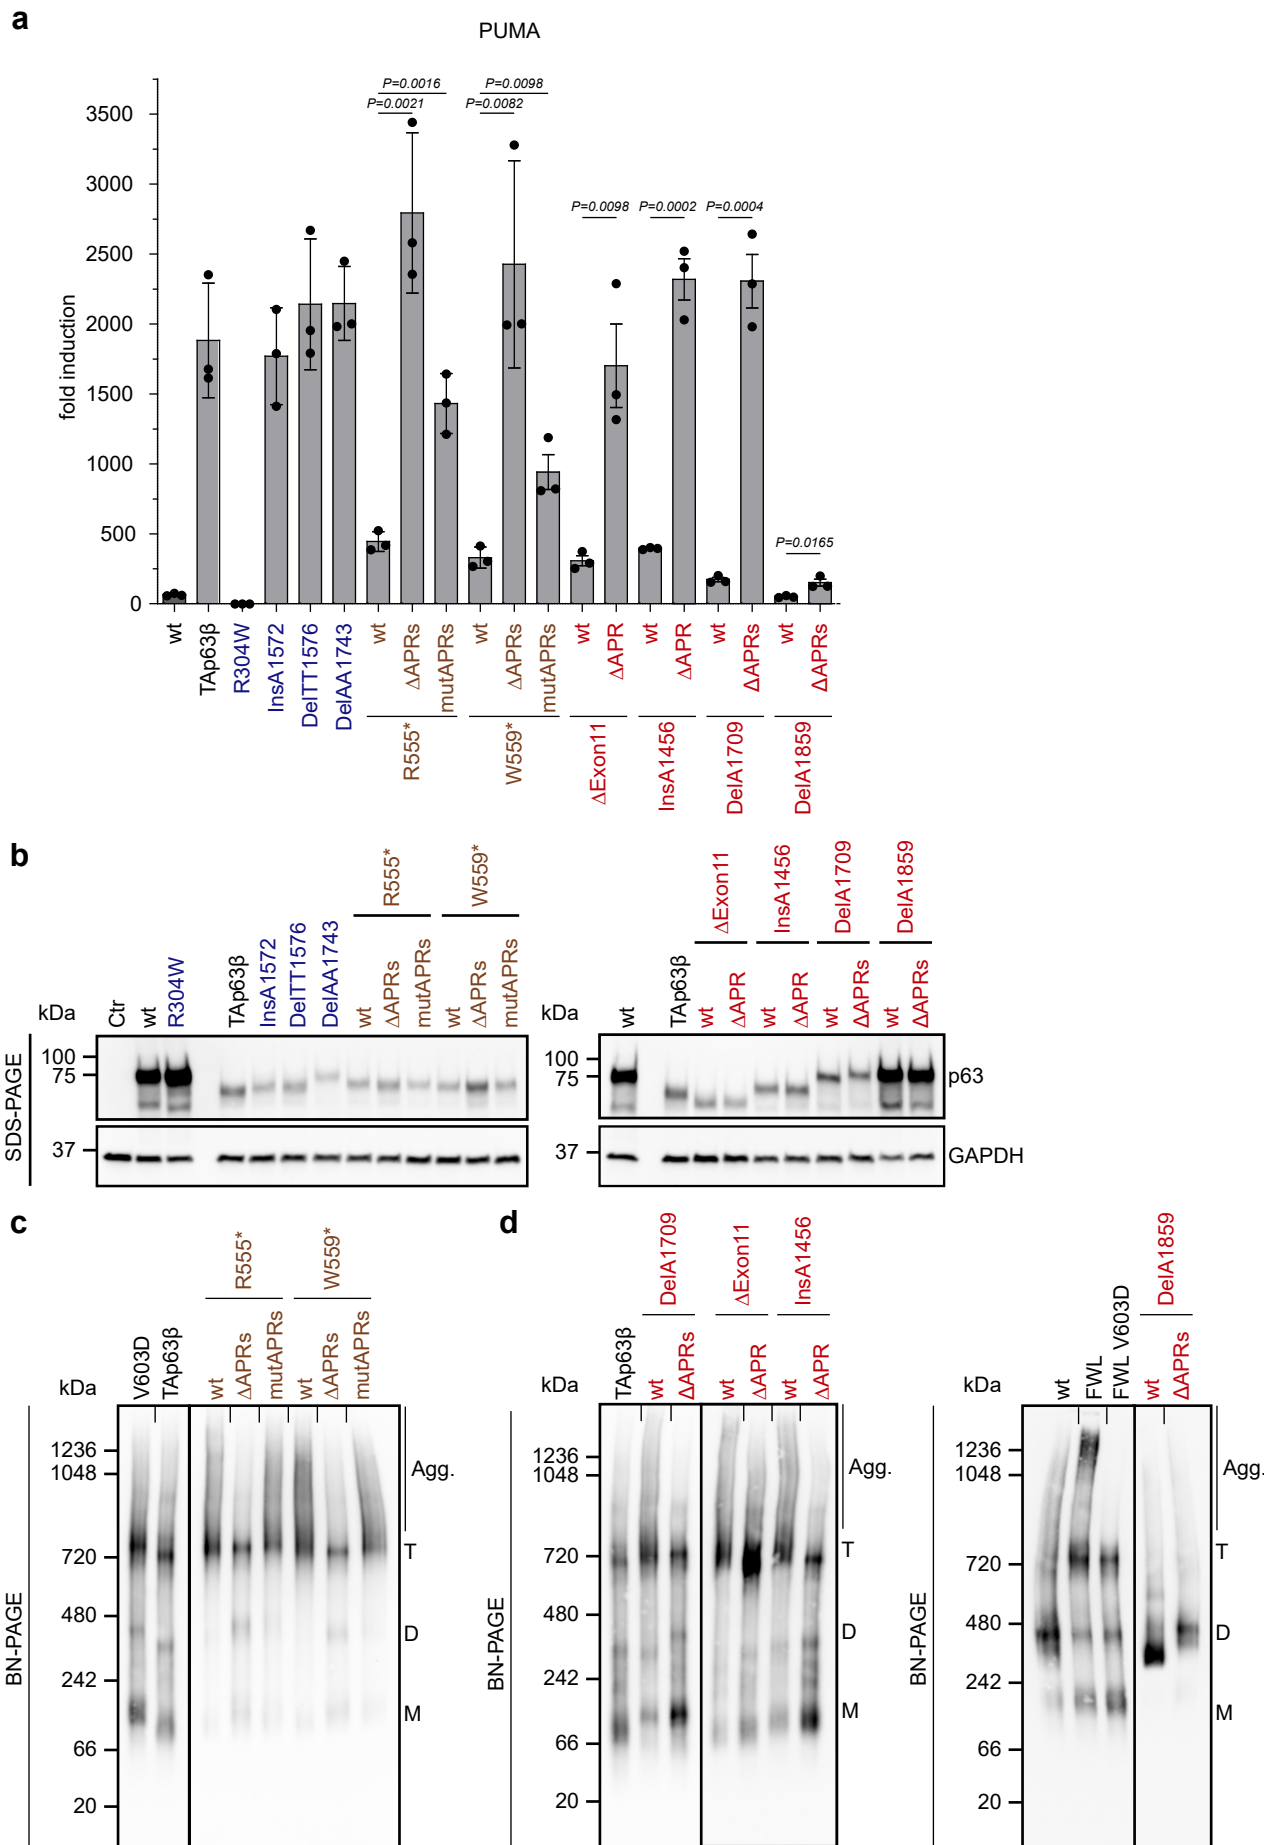

**Supplementary Fig 7. POI mutations (R555\*, W559\*) show an aggregation mechanism similar to AEC/RHS syndrome.** (a) Reporter luciferase assay of syndromic, mutant TAp63 $\alpha$  and rescue mutations by deletion of APR ( $\Delta$ APR) or Asp mutations (mutAPR).  $n=3$  biologically independent experiments, luciferase assay was performed in triplicates on PUMA 4xBS2WT responsive elements (REs). Data are presented as mean  $\pm$  SD, p-value by two-tailed unpaired Student's  $t$ -test, no adjustments for multiple comparison were made; (b) WB analysis of mutant TAp63 $\alpha$   $\Delta$ APR or mutAPR expression in the luciferase assay extracts described in a). GAPDH was used as loading control (c-d) BN-PAGE analysis of mutant TAp63 $\alpha$  and rescue mutations. Aggregation is decreased in by deletion of predicted aggregation prone regions ( $\Delta$ APR). The oligomeric conformation is indicated by T (tetramer), D (dimer), M (monomer) and, additionally, Agg. for aggregation. Source data are provided as a Source Data file.
